# Supplementary material for: Binding affinity and conformation of a conjugated AS1411 aptamer at a cationic lipid bilayer interface
Source: Royal Society of Chemistry journal article supplement (doi:10.1039/d1cp05753g), 2022-01-01
Supplement: d1cp05753g1.pdf [file d1cp05753g1.pdf]

## Electronic supplementary information

# Binding Affinity and Conformation of Conjugated AS1411 Aptamer at Cationic Lipid Bilayer Interface

Penghua Li, Liqun Wang, Meng Sun, Jiyuan Yao, Wenhui Li, Wangting Lu, Youhua Zhou, Geng Zhang, Chenglong Hu, Wanquan Zheng, Feng Wei\*

### S1. SFG spectra of Au film

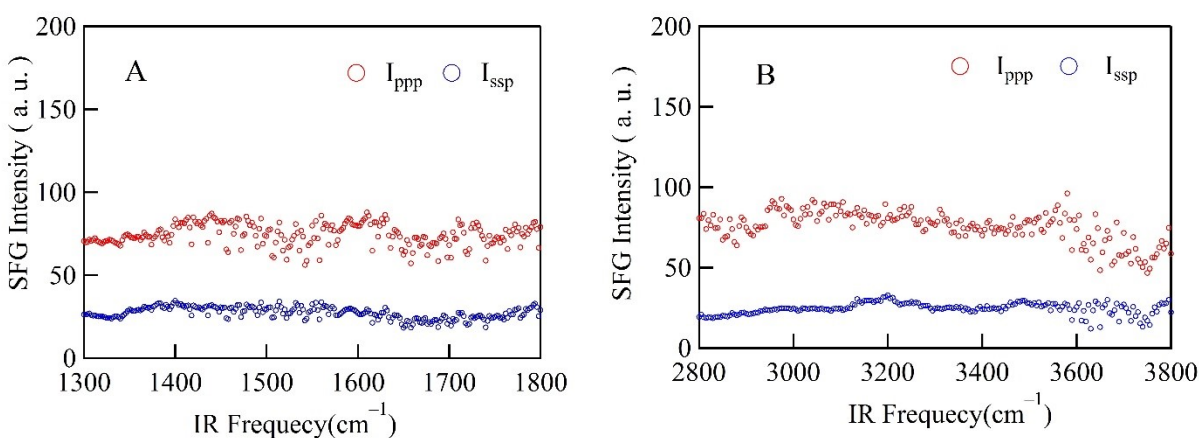

**Figure S1** SFG spectra of Au film at the CaF<sub>2</sub> prism interface within the wavenumber ranges of (A) 1300–1800 cm<sup>-1</sup> and (B) 2800–3800 cm<sup>-1</sup>.

### S2. SFG spectra of deposited monolayers

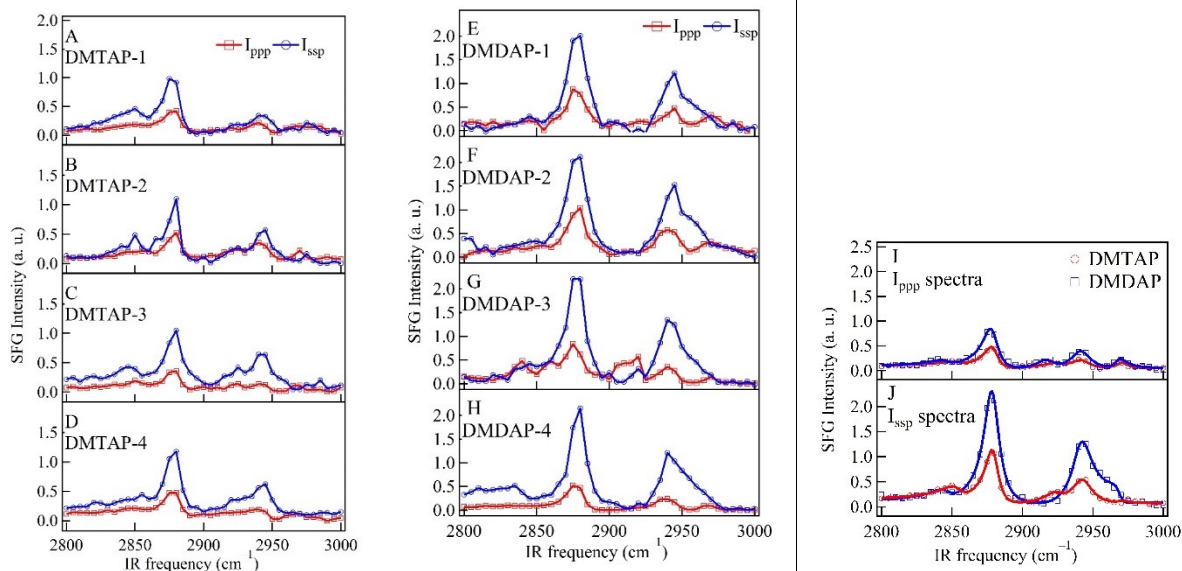

**Figure S2** SFG spectra of the deposited (A-D) DMTAP monolayers and (E-H) DMDAP monolayers at the CaF<sub>2</sub>/air interface. The averaged (I) I<sub>ppp</sub> spectra and (J) I<sub>ssp</sub> spectra of the DMTAP monolayer and DMDAP monolayer.

### S3. Zeta potential results of DMTAP and DMDAP liposomes.

For Zeta potential measurements, the lipid vesicles with a diameter of 400 nm were prepared by the vesicle extruder (Avanti polar lipids Inc.). The samples of lipid vesicles were dissolved in DI water with a concentration of 20 μM. Zeta potential measurements were performed on Zetasizer Nano ZS90 (Malvern Instruments) using a U-shaped sample cell via laser Doppler Velocimetry. The sample cell was rinsed with ethanol then DI water at least 3 times before adding the solution of lipid vesicles. The measurements were repeated 3 times for repeatability and accuracy.

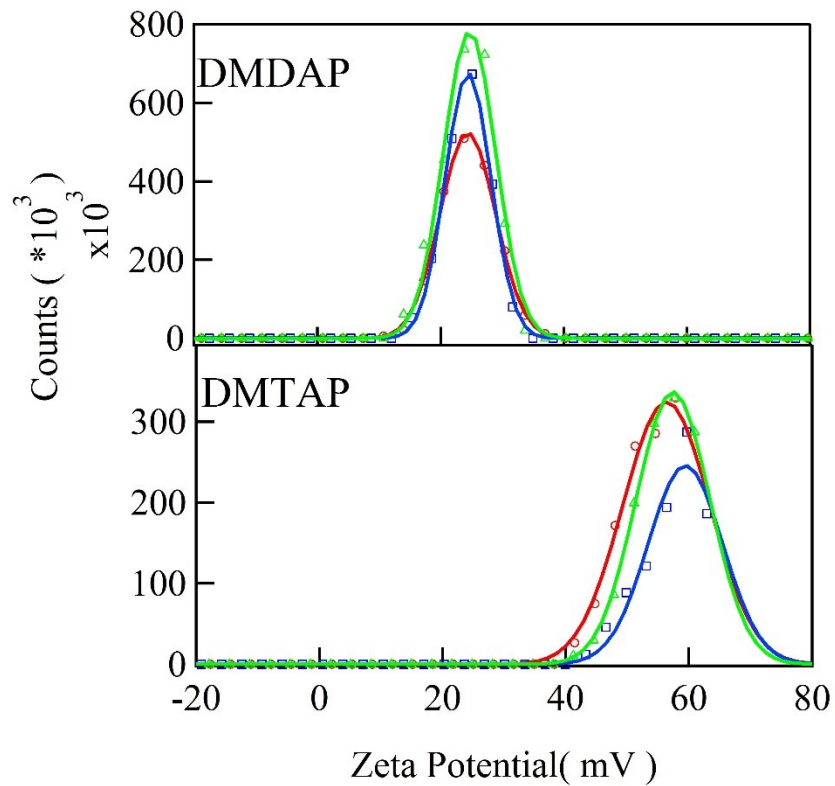

**Figure S3** The potential-dependent counts of DMTAP liposome and DMDAP liposome. The solid lines are the Gauss fitting curve of the liposome counts from each zeta potential measurement.

**Table S1. The fitting parameters of zeta potential data.**

| Lipid     | DMTAP          | DMDAP          |
|-----------|----------------|----------------|
| $\zeta_0$ | 56.4           | 24.4           |
| width     | 10.0           | 6.40           |
| $\zeta_0$ | 59.4           | 24.5           |
| width     | 8.54           | 5.25           |
| $\zeta_0$ | 57.4           | 24.7           |
| width     | 8.47           | 6.01           |
| Average   |                |                |
| $\zeta_0$ | $57.7 \pm 2.2$ | $24.5 \pm 0.2$ |

#### S4. Calculation of surface charge density and surface potential

The surface charge density can be calculated based on the mean molecular area of the lipid molecules at 32 mN/m and the head group ionization ratio of each lipid monolayer. It should be noted that in this calculation, only the charge of the outer leaflet of lipid bilayers is considered. The charge/ionization ratio of –tri-methyl-ammonium groups (DMTAP, DMEPC), and –di-methyl-ammonium groups (DMDAP) were set as +0.85, +0.5, and +0.4, respectively.<sup>1</sup>

$$\Psi_0 = \frac{2k_B T}{e} \sinh^{-1} \left( \frac{\sigma_{sum}}{\sqrt{8000k_B T N_A C \epsilon_0 \epsilon_r}} \right) \quad \backslash * MERGEFORMAT (S1)$$

where  $\sigma_{sum}$  is the summation of surface charge density,  $k_B, N_A$  are the Boltzmann constant and the Avogadro constant,  $\epsilon_r$  and  $\epsilon_0$  relative dielectric constant, dielectric constant in vacuum,  $C$  is the molar electrolyte constant.<sup>2-6</sup>

**Table S2. Estimated surface charge density and surface potential of lipid membranes**

|                                  | Lipid                                         | DMTAP      | DMDAP      |
|----------------------------------|-----------------------------------------------|------------|------------|
| Monolayer                        | Mean molecular area<br>( Å <sup>2</sup> )     | 69.5       | 38.4       |
| Bilayer<br>before<br>interaction | Surface Charge Density<br>(C/M <sup>2</sup> ) | 0.196      | 0.166      |
|                                  | Surface Potential<br>(mV)                     | +288       | +246       |
|                                  | Liposome Zeta Potential<br>(mV) *             | 57.7 ± 2.2 | 24.5 ± 0.2 |

## S5. SFG spectra of unconjugated AS1411 molecules

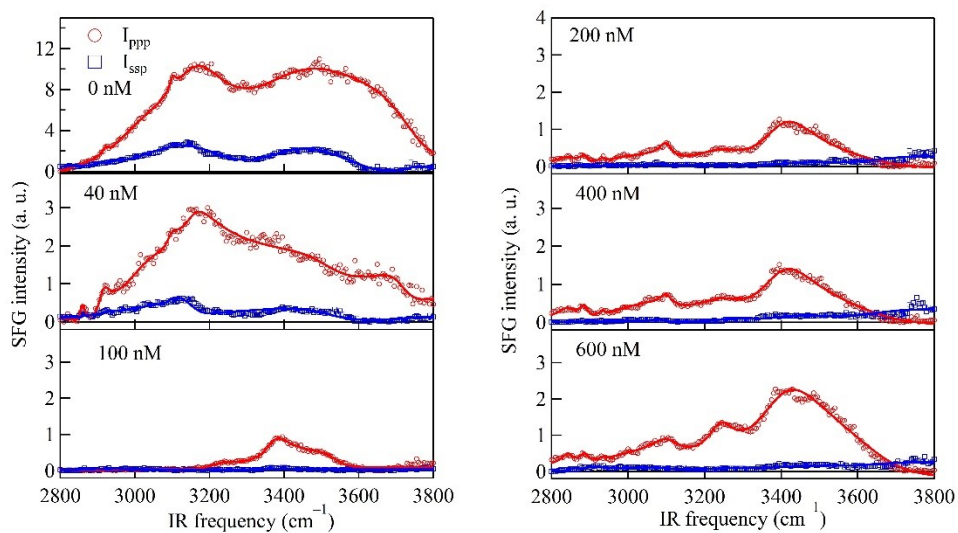

**Figure S4** SFG spectra of unconjugated AS1411 molecules interacting with DMTAP lipid bilayers in the wavenumber range of 2800–3800  $\text{cm}^{-1}$ .

### S6. SFG spectra of the lipid bilayer in $\text{D}_2\text{O}$

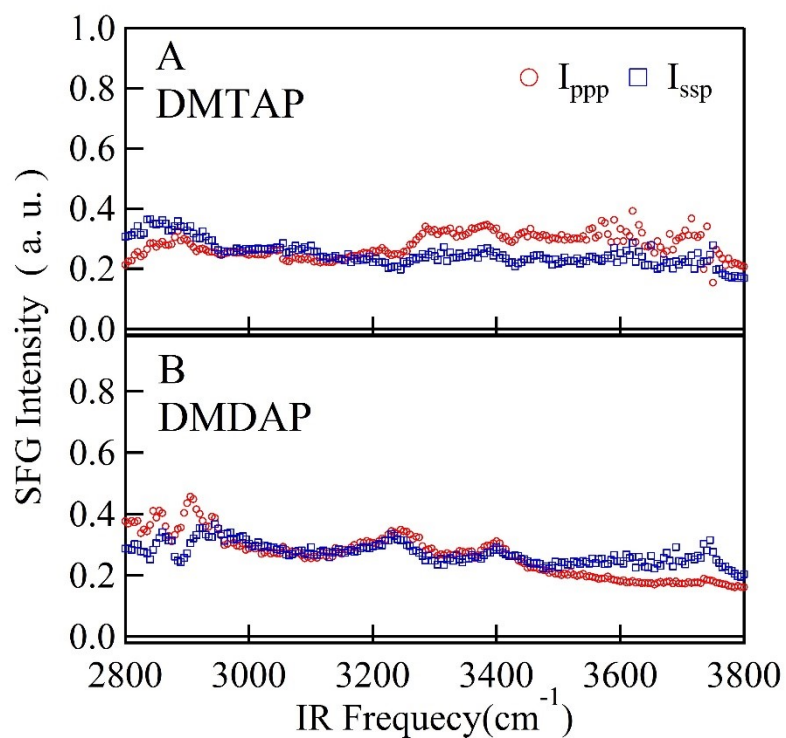

**Figure S5** SFG spectra of (A) DMTAP and (B) DMDAP lipid bilayers in  $\text{D}_2\text{O}$  solution.

### S7. Fitting of SFG–VS Signals

As described in detail elsewhere, the intensity of the SFG light is proportional to the square of the sample's second-order nonlinear susceptibility ( $\chi_{eff}^{(2)}$ ), and the intensity of the two input fields  $I_1(\omega_{vis})$  and  $I_2(\omega_{IR})$ , see eq. (S1).  $\chi_{eff}^{(2)}$  vanishes when the structure of contributing molecules/medium has an inversion of symmetry.<sup>2-6</sup>

$$I(\omega_{SFG}) \propto |\chi_{eff}^{(2)}|^2 I_1(\omega_{vis}) I_2(\omega_{IR}) \quad \backslash * MERGEFORMAT (S2)$$

where  $\omega_{SFG} = \omega_{IR} + \omega_{vis}$ . As the IR beam frequency is tuned over a vibrational resonance of surface/interface molecules, the effective surface nonlinear susceptibility can be greatly enhanced. By assuming the frequency dependence of  $\chi_{eff}^{(2)}$  at the charged surface in the ionic solution can be described is described by:<sup>2-5</sup>

$$\chi_{eff}^{(2)}(\omega_{IR}) = \chi_{NR}^{(2)} + \chi_s^{(2)} + \chi_{EDL}^{(2)} = \chi_{NR}^{(2)} + N_s \chi_s^{(2)} + C_B \chi_B^{(3)} \frac{k}{k + i\Delta k_z} \Psi_0 \quad \backslash *$$

$$MERGEFORMAT (S3)$$

$$1/k = (8\pi L_B c_{salt})^{-\frac{1}{2}} ; \frac{0.304}{\sqrt{c_{salt}}} nm \quad \backslash * MERGEFORMAT (S4)$$

where  $\chi_{NR}^{(2)}$ ,  $\chi_s^{(2)}$  and  $\chi_{EDL}^{(2)}$  are the non-resonant response, the response of molecules on the surface, and the response of molecules in electric double layer respectively. If we assume the molecules on the surface and the molecules in the electrical double layer have the same vibrational resonance.

The fitting parameters ( $1/k$ ,  $1/\Delta k_z$ ,  $\Psi_0$ ) in different salt concentrations are listed in Table S3. The plot of the SFG signal vs. the IR input frequency shows a polarization-dependent vibrational spectrum of the molecules at the surface or interface.  $A_v$ ,  $\omega_v$ , and  $\Gamma_v$  can be extracted by fitting the spectrum using Eq.S5.

$$\begin{aligned}\chi_{eff}^{(2)}(\omega_{IR}) &= \chi_{NR}^{(2)} + \sum_{\nu} \frac{A_s^{(2)} + \Psi_0 A_B^{(3)} \frac{k}{k + i\Delta k_z}}{\omega_{IR} - \omega_{\nu} + i\Gamma_{\nu}} \\ &= \chi_{NR}^{(2)} + \sum_{\nu} \frac{A_s^{(2)}(\omega_{IR} - \omega_{\nu}) + \Psi_0 [A_B^{(3)}(\omega_{IR} - \omega_{\nu})F_1 - A_B^{(3)}\Gamma_{\nu}F_2]}{(\omega_{IR} - \omega_{\nu})^2 + \Gamma_{\nu}^2} + \frac{A_s^{(2)}\Gamma_{\nu} + \Psi_0 [A_B^{(3)}(\omega_{IR} - \omega_{\nu})F_2 + A_B^{(3)}\Gamma_{\nu}F_1]}{(\omega_{IR} - \omega_{\nu})^2 + \Gamma_{\nu}^2}\end{aligned}$$

\\* MERGEFORMAT (S5)

$$F_1 = \frac{k^2}{k^2 + \Delta k_z^2} \quad \text{\* MERGEFORMAT (S6)}$$

$$F_2 = \frac{k\Delta k_z}{k^2 + \Delta k_z^2} \quad \text{\* MERGEFORMAT (S7)}$$

where  $\omega_{\nu}$ , and  $\Gamma_{\nu}$  are the resonant frequency, and damping coefficient of the vibrational mode( $\nu$ ), respectively.  $A_s^{(2)}$ ,  $A_B^{(3)}$  are the amplitudes of the second-order susceptibilities of the surface and third-order susceptibilities of the EDL.

**Table S3. The fitting parameters for  $\chi_{EDL}^{(2)}$ .**

| Concentration<br>Mol/L | 1/k<br>nm | 1/ $\Delta k_z$<br>nm | F <sub>1</sub> | F <sub>2</sub> |
|------------------------|-----------|-----------------------|----------------|----------------|
| 0.001                  | 96.1      | 43                    | 0.1667         | 0.3727         |

### S8. The fitting parameters of AS1411 molecules

**Table S4. The fitting parameters of AS1411 molecules**

| Molecules     |               |               |               | Assignments                       |
|---------------|---------------|---------------|---------------|-----------------------------------|
| DMTAP<br>AS-A | DMTAP<br>AS-C | DMDAP<br>AS-A | DMDAP<br>AS-C |                                   |
| 1370          | 1382          | 1370          | 1370          | C <sub>2</sub> ' -endo/syn-dG     |
| 1398          | 1400          | 1398          | 1398          | CH <sub>2</sub> bending           |
| 1450          | 1450          | 1450          | 1450          | CH <sub>3</sub> bending           |
| 1484          | 1475          | 1483          | 1482          | dG-N <sub>5</sub> ring stretching |
| 1538          | 1533          | 1539          | 1539          | dG-N <sub>7</sub> ring stretching |
| 1570          | 1569          | 1569          | 1569          | dG or dT ring                     |

|      |      |      |      |                                                                            |
|------|------|------|------|----------------------------------------------------------------------------|
|      |      |      |      | stretching                                                                 |
| 1611 | 1611 | 1610 | 1610 | dG-NH <sub>2</sub> bending                                                 |
| 1662 | 1662 | 1659 | 1665 | dT in-phase<br>C <sub>4</sub> =O/C <sub>5</sub> =C <sub>6</sub> stretching |
| 1710 | 1715 | 1709 | 1713 | dG C <sub>6</sub> =O & C <sub>8</sub> =C <sub>9</sub><br>stretching        |
| N/A  | N/A  | N/A  | 2847 | CH <sub>2</sub> - symmetric<br>stretching                                  |
| N/A  | N/A  | N/A  | 2877 | CH <sub>3</sub> - symmetric<br>stretching                                  |
| N/A  | 3087 | 3070 | 3072 | CH stretching in dG and<br>dT                                              |
| 3171 | 3145 | 3114 | 3118 | NH stretching in dG and<br>dT                                              |
| 3265 | 3264 | 3255 | 3256 | NH <sub>2</sub> -Fermi                                                     |
| 3397 | 3396 | 3389 | 3392 | NH <sub>2</sub> symmetric<br>stretching                                    |
| N/A  | 3479 | 3480 | 3485 | NH <sub>2</sub> anti-symmetric<br>stretching                               |

### S9. The orientation and Susceptibilities of molecular groups

The molecular orientation information can be obtained by relating SFG susceptibility tensor elements  $\chi_{ijk}^{(2)}(i, j, k = x, y, z)$  in the laboratory frame to the SFG molecular hyperpolarizability tensor elements  $\beta_{lmn}^{(2)}(l, m, n = a, b, c)$  in the molecular frame via the Euler transformation.<sup>6, 7</sup> The Euler transformation used here follows the z-x-y convention, which has a matrix in the following formula.

$$\chi_{ijk,q}^{(2)} = \sum_{l,m,n} N_s \langle R_{il} R_{jm} R_{kn} \rangle \beta_{lmn,q} \quad \text{\textit{MERGEFORMAT (S8)}}$$

$$R_{il,jm,kn} =$$

$$\begin{pmatrix} -\sin(\varphi)\cos(\theta)\sin(\psi) + \cos(\varphi)\cos(\psi) & -\sin(\varphi)\cos(\theta)\cos(\psi) - \cos(\varphi)\sin(\psi) & \sin(\varphi)\sin(\theta) \\ \cos(\varphi)\cos(\theta)\sin(\psi) + \sin(\varphi)\cos(\psi) & \cos(\varphi)\cos(\theta)\cos(\psi) - \sin(\varphi)\sin(\psi) & -\cos(\varphi)\sin(\theta) \\ \sin(\theta)\sin(\psi) & \sin(\theta)\cos(\psi) & \cos(\theta) \end{pmatrix} \text{\textit{MERGEFORMAT (S8)}}$$



The components of the  $\chi_{\text{eff}}^{(2)}$  of the ssp, and ppp polarization combinations are given in susceptibilities in the lab coordinate system which is defined as the z-axis is along the surface normal and the x-axis is in the incident plane.<sup>8-11</sup>

$$\chi_{\text{eff,ssp}}^{(2)} = L_{yy}(\omega_{SF})L_{yy}(\omega_{Vis})L_{zz}(\omega_{IR})\sin\beta_{IR}\chi_{yyz}^{(2)} \quad \backslash * \text{MERGEFORMAT (S10)}$$

$$\begin{aligned} \chi_{\text{eff,ppp}}^{(2)} = & -L_{xx}(\omega_{SF})L_{xx}(\omega_{Vis})L_{zz}(\omega_{IR})\cos\beta_{SF}\cos\beta_{Vis}\sin\beta_{IR}\chi_{xxz}^{(2)} \\ & -L_{xx}(\omega_{SF})L_{zz}(\omega_{Vis})L_{xx}(\omega_{IR})\cos\beta_{SF}\sin\beta_{Vis}\cos\beta_{IR}\chi_{xzx}^{(2)} \\ & +L_{zz}(\omega_{SF})L_{xx}(\omega_{Vis})L_{xx}(\omega_{IR})\sin\beta_{SF}\cos\beta_{Vis}\cos\beta_{IR}\chi_{zxx}^{(2)} \\ & +L_{zz}(\omega_{SF})L_{zz}(\omega_{Vis})L_{zz}(\omega_{IR})\sin\beta_{SF}\sin\beta_{Vis}\sin\beta_{IR}\chi_{zzz}^{(2)} \end{aligned} \quad \backslash * \text{MERGEFORMAT (S11)}$$

where  $\beta_{SF}$ ,  $\beta_{Vis}$ , and  $\beta_{IR}$  are the angles between the surface normal and the sum frequency beam, the input visible beam, and the input IR beam, respectively.  $L_{ii}$  (i = x, y or z) denotes the Fresnel coefficients.

For lipid monolayers at CaF<sub>2</sub>/air interface, Eq. S10 and Eq. S11 are then given by:

$$\chi_{\text{eff,ssp}}^{(2)} = 1.229\chi_{yyz}^{(2)} \quad \backslash * \text{MERGEFORMAT (S12)}$$

$$\chi_{\text{eff,ppp}}^{(2)} = -0.127\chi_{xxz}^{(2)} - 0.120\chi_{xzx}^{(2)} + 0.115\chi_{zxx}^{(2)} + 1.374\chi_{zzz}^{(2)} \quad \backslash * \text{MERGEFORMAT (S13)}$$

Because  $\chi_{xxz}^{(2)}$  equals to  $\chi_{yyz}^{(2)}$  for C<sub>∞</sub> symmetry, the  $\chi_{xxz}^{(2)}$  and  $\chi_{zzz}^{(2)}$  susceptibility components are the main contributors to the ssp and ppp signals, respectively. With an azimuthal symmetry of the molecules at the interface, the dependence of  $\chi_{xxz}^{(2)}$  and  $\chi_{zzz}^{(2)}$  susceptibility components on the molecular hyperpolarizability can be described by the following equations.<sup>8-11</sup>

A mode:

$$\chi_{xxz}^{(2),A} = \chi_{yyz}^{(2),A} = N_s\beta_{ccc}G(\theta) = N_s\beta_{ccc}\frac{1}{2}([r+1]\langle\cos\theta\rangle + [r-1]\langle\cos^3\theta\rangle) \quad \backslash * \text{MERGEFORMAT (S14)}$$

$$\chi_{zzz}^{(2),A} = N_s\beta_{ccc}G(\theta) = N_s\beta_{ccc}[r\langle\cos\theta\rangle + (1-r)\langle\cos^3\theta\rangle] \quad \backslash * \text{MERGEFORMAT (S15)}$$

$$\text{where } r = \frac{\beta_{aac}}{\beta_{ccc}} = \frac{\beta_{bbc}}{\beta_{ccc}} = \frac{\alpha_{aa}^{(2)}}{\alpha_{cc}^{(2)}} = \frac{\alpha_{bb}^{(2)}}{\alpha_{cc}^{(2)}}.$$

For the lipid bilayers and AS1411 molecules at CaF<sub>2</sub>/water interface, the Fresnel coefficient constants are then given by:

$$\chi_{\text{eff,ssp}}^{(2)} = 1.319 \chi_{\text{yyz}}^{(2)} \quad \backslash * \text{MERGEFORMAT (S16)}$$

$$\chi_{\text{eff,ppp}}^{(2)} = -0.137 \chi_{\text{xxz}}^{(2)} - 0.110 \chi_{\text{xzx}}^{(2)} + 0.105 \chi_{\text{zxx}}^{(2)} + 1.184 \chi_{\text{zzz}}^{(2)} \quad \backslash * \text{MERGEFORMAT (S17)}$$

Because  $\chi_{\text{xxz}}^{(2)}$  equals to  $\chi_{\text{yyz}}^{(2)}$  for C<sub>∞</sub> symmetry, the  $\chi_{\text{xxz}}^{(2)}$  and  $\chi_{\text{zzz}}^{(2)}$  susceptibility components are the main contributors to the ssp and ppp signals, respectively. With an azimuthal symmetry of the molecules at the interface, the dependence of  $\chi_{\text{xxz}}^{(2)}$  and  $\chi_{\text{zzz}}^{(2)}$  susceptibility components on the molecular hyperpolarizability can be described by the following equations.<sup>8-11</sup>

A<sub>1</sub> mode:

$$\begin{aligned} \chi_{\text{xxz}}^{(2),A1} = \chi_{\text{yyz}}^{(2),A1} = & \frac{1}{2} N_s \beta_{ccc} [\langle \cos^2 \psi \rangle r_a + \langle \sin^2 \psi \rangle r_b + 1] \langle \cos \theta \rangle \\ & + \frac{1}{2} N_s \beta_{ccc} [\langle \sin^2 \psi \rangle r_a + \langle \cos^2 \psi \rangle r_b - 1] \langle \cos^3 \theta \rangle \end{aligned} \quad \backslash * \text{MERGEFORMAT (S18)}$$

$$\begin{aligned} \chi_{\text{zzz}}^{(2),A1} = & N_s \beta_{ccc} [\langle \sin^2 \psi \rangle r_a + \langle \cos^2 \psi \rangle r_b] \langle \cos \theta \rangle \\ & - N_s \beta_{ccc} [\langle \sin^2 \psi \rangle r_a + \langle \cos^2 \psi \rangle r_b - 1] \langle \cos^3 \theta \rangle \end{aligned} \quad \backslash * \text{MERGEFORMAT (S19)}$$

where  $\psi$  is the twisting angle of the nucleotide base groups.

For the nucleotide groups which can be freely rotated, the Eq. S18 and Eq. S19 can be simplified into:

$$\chi_{\text{xxz}}^{(2),A1} = \chi_{\text{yyz}}^{(2),A1} = N_s \beta_{ccc} G(\theta) = N_s \beta_{ccc} \frac{1}{4} \left( [r_a + r_b + 2] \langle \cos \theta \rangle + [r_a + r_b - 2] \langle \cos^3 \theta \rangle \right) \quad \backslash * \text{MERGEFORMAT (S20)}$$

$$\chi_{\text{zzz}}^{(2),A1} = N_s \beta_{ccc} G(\theta) = N_s \beta_{ccc} \frac{1}{2} \left( [r_a + r_b] \langle \cos \theta \rangle - [r_a + r_b - 2] \langle \cos^3 \theta \rangle \right) \quad \backslash * \text{MERGEFORMAT (S21)}$$

where

$$r_a = \frac{\beta_{aac}}{\beta_{ccc}} = \frac{\alpha_{aa}^{(2)}}{\alpha_{cc}^{(2)}} \quad \backslash * \text{MERGEFORMAT (S22)}$$

$$r_b = \frac{\beta_{bbc}}{\beta_{ccc}} = \frac{\alpha_{bb}^{(2)}}{\alpha_{cc}^{(2)}} \quad \backslash * \text{MERGEFORMAT (S23)}$$

### S9.1 CH<sub>3</sub> symmetric stretching mode

By setting the  $r$  value for the CH<sub>3</sub>-SS mode as 3.4, the deduced tilt angle related function of susceptibilities  $G(\theta)_{ppp}$ ,  $G(\theta)_{ssp}$ , and susceptibility ratio

$R = \chi_{ppp,CH_3-ss}^{(2)} / \chi_{ssp,CH_3-ss}^{(2)} = G(\theta)_{ppp} / G(\theta)_{ssp}$  can be plotted as a function of the tilt angle.

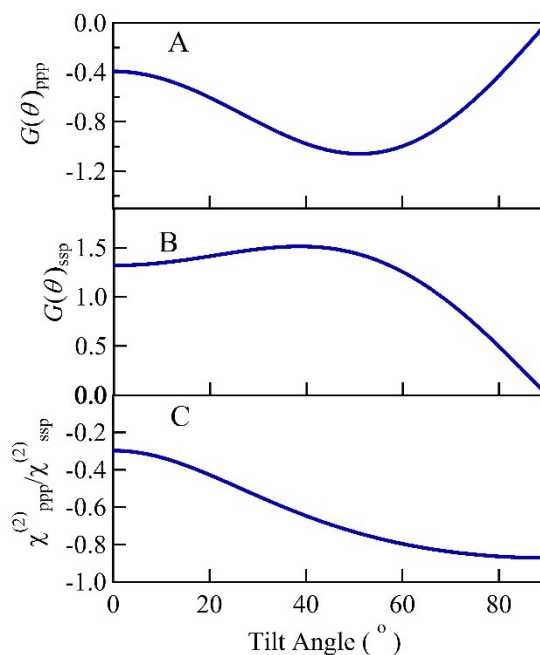

**Figure S6** Simulated tilt angle related function of susceptibilities (A)  $G(\theta)_{ppp}$ , (B)  $G(\theta)_{ssp}$ , and (C)

susceptibility ratio  $R = \frac{\chi_{ppp}^{(2)}}{\chi_{ssp}^{(2)}} = \frac{G(\theta)_{ppp}}{G(\theta)_{ssp}}$  of CH<sub>3</sub> symmetric stretching mode.

### S9.2 Thymine C<sub>4</sub>=O & C<sub>5</sub>=C<sub>6</sub> in phase stretching mode

The Raman tensors of thymidine groups at 1665 cm<sup>-1</sup> have been reported in previous literature

(C1 coordinates,  $r_a = \frac{\alpha_{aa}^{(2)}}{\alpha_{cc}^{(2)}} = 4.31$ ,  $r_b = \frac{\alpha_{bb}^{(2)}}{\alpha_{cc}^{(2)}} = 0.25$ ).<sup>12, 13</sup> The molecular coordinate is determined

by taking the plane of thymine aromatic ring as bc plane and taking the  $\mu_{C_4=O}$  vector as c-axis. The IR dipole moment at the wavenumber of C<sub>4</sub>=O & C<sub>5</sub>=C<sub>6</sub> in-phase mode either can be the same as the vector of C<sub>4</sub>=O bond or can be calculated using the vibration displacements of each atom (  $\frac{\partial x}{\partial Q}$ ,  $\frac{\partial y}{\partial Q}$ ,  $\frac{\partial z}{\partial Q}$  ) listed in the Gaussian output file (\*.out or \*.gjf).<sup>12, 13</sup>

$$\frac{\partial \mu_Q}{\partial Q} = \sum_n M_n \left( \frac{\partial x}{\partial Q} \frac{\partial \mu_n}{\partial x} \mathbf{r} + \frac{\partial y}{\partial Q} \frac{\partial \mu_n}{\partial y} \mathbf{y} + \frac{\partial z}{\partial Q} \frac{\partial \mu_n}{\partial z} \mathbf{z} \right) \quad \text{MERGEFORMAT (S24)}$$

Where  $M_n$  is the relative mass of each atom,  $\frac{\partial \mu_n}{\partial x}$ ,  $\frac{\partial \mu_n}{\partial y}$  and  $\frac{\partial \mu_n}{\partial z}$  are the dipole derivatives of

each atom listed at the end of the Gaussian output file. It should also be noted that the guanine residues also have contributions to SFG intensities around 1665 cm<sup>-1</sup>, which may affect the accuracy of the fitting results of 1665 cm<sup>-1</sup> (C<sub>4</sub>=O & C=C in phase stretching of thymine groups) peak.

**Table S5.** Derivatives of Raman tensors and IR transition dipoles of C<sub>4</sub>=O & C<sub>5</sub>=C<sub>6</sub> in phase stretching mode at 1665 cm<sup>-1</sup>.

| Vibrational mode    | $\frac{\partial \alpha_{\text{Raman}}}{\partial Q}$                                                         | $\frac{\partial \mu_{\text{IR}}}{\partial Q}$ |
|---------------------|-------------------------------------------------------------------------------------------------------------|-----------------------------------------------|
| Data from Ref. 13   | $\begin{vmatrix} 0.232 & 0 & 0 \\ 0 & 0.058 & 0 \\ 0 & 0 & 1 \end{vmatrix}$                                 | $\begin{vmatrix} 0 \\ 0 \\ 1 \end{vmatrix}$   |
| Calculated Results* | $\begin{vmatrix} 0.329 & 0.137 & -0.283 \\ 0.137 & 0.127 & -0.142 \\ -0.283 & -0.142 & 0.834 \end{vmatrix}$ | $\begin{vmatrix} 0 \\ 0 \\ 1 \end{vmatrix}$   |

\*The derivatives of IR dipole of Thymidine groups were calculated by Gaussian 09 using

Hartree-Fork method with 3-21G+\*\* basis.<sup>14</sup>

The deduced susceptibilities  $\chi_{ppp}^{(2)}$ ,  $\chi_{ssp}^{(2)}$ , and susceptibility ratio  $\chi_{ppp,thymine}^{(2)} / \chi_{ssp,thymine}^{(2)}$  can also be plotted as a function of the tilt angle.

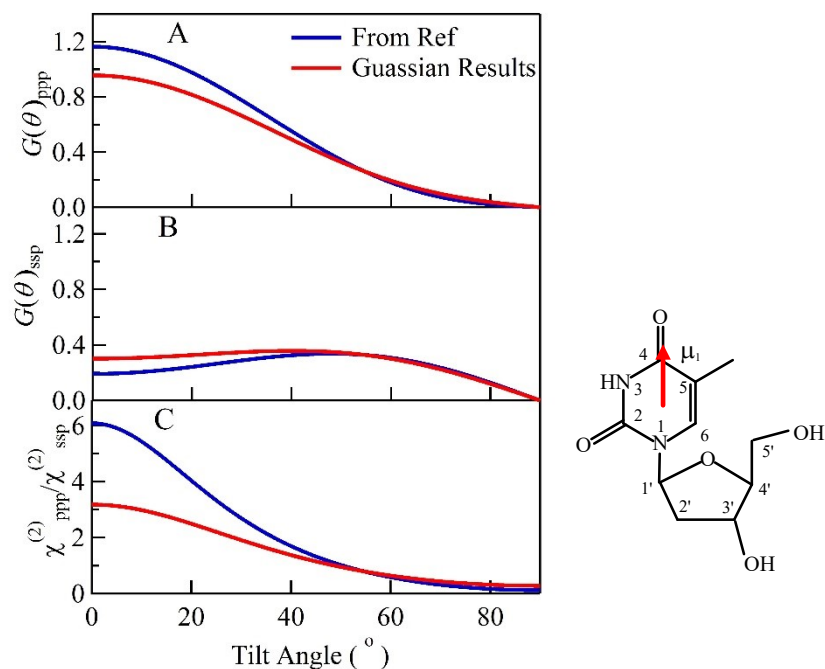

**Figure S7** Simulated tilt angle related function of susceptibilities (A)  $G(\theta)_{ppp}$ , (B)  $G(\theta)_{ssp}$ , and (C)

susceptibility ratio  $R = \frac{\chi_{ppp}^{(2)}}{\chi_{ssp}^{(2)}} = \frac{G(\theta)_{ppp}}{G(\theta)_{ssp}}$  of  $C_4=O$  &  $C_5=C_6$  in phase stretching mode of thymine group.

### S9.3 Guanine dG-N<sub>5</sub> ring stretching mode at ~1485 cm<sup>-1</sup>.

The Raman tensors of guanine residue at ~1485 cm<sup>-1</sup> were reported in previous literature.<sup>15, 16</sup> The IR dipole of guanine residue (G7K, most stable) was calculated by Gaussian09 using Hartree-Fork 3-21G+\*\* method.<sup>14</sup> The molecular coordinate is determined by taking the plane of guanine aromatic ring as YZ plane, the  $\vec{V}_{N_7-N_5}$  vector as Y-axis, and the  $\vec{V}_{C_6=O}$  vector as Z-axis. The IR dipole moment at the wavenumber of 1485cm<sup>-1</sup> was calculated using the vibration displacements of each atom listed in \*.out file.

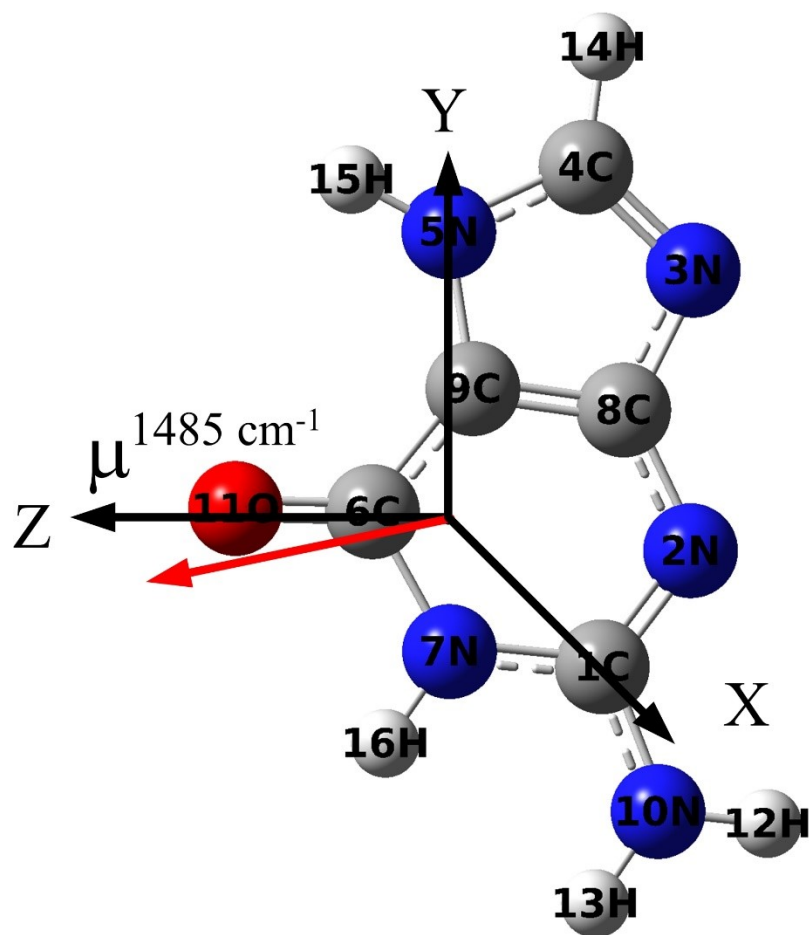

**Figure S8.** The IR dipole of Guanine base residue which calculated by Guassian09.

The Raman tensors and IR dipoles of quadruplex structures were calculated based on the NMR results and molecular coordinates of oligonucleotide molecules. The PDB IDs for C<sub>12</sub>TG14 and C<sub>12</sub>Oxy28 are 148D and 201D respectively (DOI:[10.2210/pdb148d/pdb](https://doi.org/10.2210/pdb148d/pdb) and DOI:[10.2210/pdb201d/pdb](https://doi.org/10.2210/pdb201d/pdb)). The detailed calculation methods can be found in recent reviews.<sup>10, 11</sup>

**Table S6.** Raman tensors and IR dipoles of guanine residue at 1485 cm<sup>-1</sup>(dG-N<sub>5</sub> ring stretching).

| Structure | $\alpha_{\text{Raman}}$ | $\mu_{\text{IR}}$ |
|-----------|-------------------------|-------------------|
|-----------|-------------------------|-------------------|

|                        |                                                                         |                                                         |
|------------------------|-------------------------------------------------------------------------|---------------------------------------------------------|
| Data from Ref.<br>13   | $\begin{vmatrix} 0.023 & 0 & 0 \\ 0 & 1 & 0 \\ 0 & 0 & 1 \end{vmatrix}$ | $\begin{vmatrix} 0 \\ 0 \\ 1 \end{vmatrix}$             |
| Calculated<br>Results* | $\begin{vmatrix} 0.149 & 0 & 0 \\ 0 & 1 & 0 \\ 0 & 0 & 1 \end{vmatrix}$ | $\begin{vmatrix} 0.107 \\ 0.328 \\ 0.938 \end{vmatrix}$ |

According to the calculation results, the deduced tilt angle related function of susceptibilities ( $G(\theta)_{ppp}, G(\theta)_{ssp}$ ) and susceptibility ratio  $R = \chi_{ppp}^{(2)}/\chi_{ssp}^{(2)}$  of dG-N<sub>5</sub> ring stretching of the guanine groups are plotted as a function of the tilt angle.

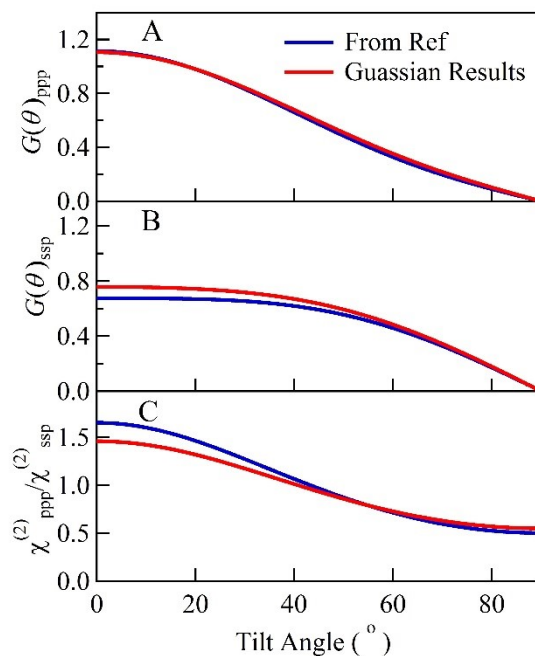

**Figure S9** Simulated tilt angle related function of susceptibilities (A)  $G(\theta)_{ppp}$ , (B)  $G(\theta)_{ssp}$ , and (C)

susceptibility ratio  $R = \frac{\chi_{ppp}^{(2)}}{\chi_{ssp}^{(2)}} = \frac{G(\theta)_{ppp}}{G(\theta)_{ssp}}$  of dG-N<sub>5</sub> ring stretching of guanine groups.

#### S10. Time dependence of the calculated SFG susceptibility ratios

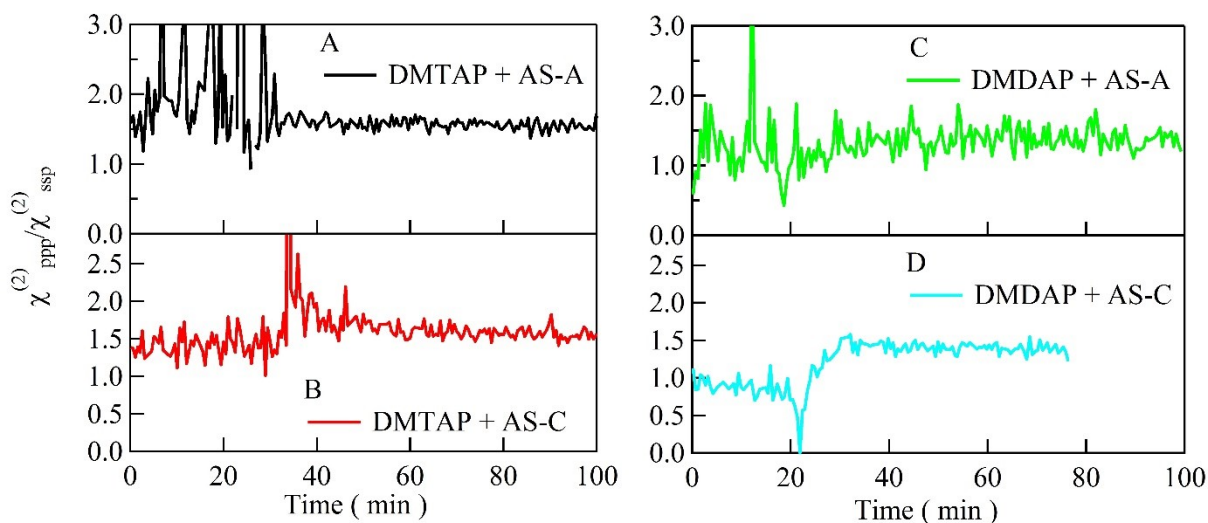

**Figure S10** The time dependence of the calculated SFG susceptibility ratios  $R_{1665} = \sqrt{I_{ppp}/I_{ssp}}$  (1665  $\text{cm}^{-1}$ ) during the adsorption of conjugated AS1411 molecules on cationic lipid membranes. (A) DMTAP + AS-A; (B) DMTAP + AS-C; (C) DMDAP + AS-A; (D) DMDAP + AS-C.

## Reference

1. Roberts, J. D.; Clement, R. A.; Drysdale, J. J., The Electrical Effect of the Trimethylammonium [ $-\text{N}(\text{CH}_3)_3^{\oplus}$ ] Group. *J. Am. Chem. Soc.* **1951**, *73*, 2181-2183.
2. Gonella, G.; Lütgebaucks, C.; de Beer, A. G. F.; Roke, S., Second Harmonic and Sum-Frequency Generation from Aqueous Interfaces Is Modulated by Interference. *J. Phys. Chem. C* **2016**, *120*, 9165-9173.
3. Wang, H. F., Sum frequency generation vibrational spectroscopy (SFG-VS) for complex molecular surfaces and interfaces: Spectral lineshape measurement and analysis plus some controversial issues. *Prog. Surf. Sci.* **2016**, *91*, 155-182.
4. Ohno, P. E.; Wang, H. F.; Geiger, F. M., Second-order spectral lineshapes from charged interfaces. *Nat. Comm.* **2017**, *8*, 1032.
5. Ohno, P. E.; Wang, H. F.; Paesani, F.; Skinner, J. L.; Geiger, F. M., Second-Order Vibrational Lineshapes from the Air/Water Interface. *J. Phys. Chem. A* **2018**, *122*, 4457-4464.
6. Y. R. Shen, *The Principles of Nonlinear Optics*, 1st ed; John Wiley & Sons: New York, 1984.
7. Moad, A. J.; Simpson, G. J. *A Unified Treatment of Selection Rules and Symmetry Relations*



for Sum-Frequency and Second Harmonic Spectroscopies. *J. Phys. Chem. B* **2004**, *108*, 3548-3562.

8. Chen, X.; Wang, J.; Boughton, A. P.; Kristalyn, C. B.; Chen, Z. Multiple Orientation of Melittin inside a Single Lipid Bilayer Determined by Combined Vibrational Spectroscopic Studies. *J. Am. Chem. Soc.* **2007**, *129*, 1420-1427.

9. Wang, J.; Lee, S. H.; Chen Z. Quantifying the Ordering of Adsorbed Proteins in Situ. *J. Phys. Chem. B* **2008**, *112*, 2281-2290.

10. Nguyen, K. T.; Le Clair, S. V.; Ye, S.; Chen, Z. Orientation Determination of Protein Helical Secondary Structures Using Linear and Nonlinear Vibrational Spectroscopy. *J. Phys. Chem. B* **2009**, *113*, 12169-12180.

11. Lee, S.; Wang, J.; Krimm, S.; Chen, Z. Quantifying the Ordering of Adsorbed Proteins In Situ. *J. Phys. Chem. A* **2006**, *110*, 7035-7044.

12. Thomas, G. J., Jr.; Benevides, J. M.; Overman, S. A.; Ueda, T.; Ushizawa, K.; Saitoh, M.; Tsuboi, M., Polarized Raman spectra of oriented fibers of A DNA and B DNA: anisotropic and isotropic local Raman tensors of base and backbone vibrations. *Biophys. J.* **1995**, *68*, 1073-1088.

13. Benevides, J. M.; Overman, S. A.; Thomas, G. J., Raman, polarized Raman and ultraviolet resonance Raman spectroscopy of nucleic acids and their complexes. *J. Raman Spectrosc.* **2005**, *36*, 279-299.

14. Gaussian 09, Revision D.01, Frisch, M. J.; Trucks, G. W.; Schlegel, H. B.; Scuseria, G. E.; Robb, M. A.; Cheeseman, J. R.; Scalmani, G.; Barone, V.; Mennucci, B.; Petersson, G. A.; Nakatsuji, H.; Caricato, M.; Li, X.; Hratchian, H. P.; Izmaylov, A. F.; Bloino, J.; Zheng, G.; Sonnenberg, J. L.; Hada, M.; Ehara, M.; Toyota, K.; Fukuda, R.; Hasegawa, J.; Ishida, M.; Nakajima, T.; Honda, Y.; Kitao, O.; Nakai, H.; Vreven, T.; Montgomery, J. A., Jr.; Peralta, J. E.; Ogliaro, F.; Bearpark, M.; Heyd, J. J.; Brothers, E.; Kudin, K. N.; Staroverov, V. N.; Kobayashi, R.; Normand, J.; Raghavachari, K.; Rendell, A.; Burant, J. C.; Iyengar, S. S.; Tomasi, J.; Cossi, M.; Rega, N.; Millam, M. J.; Klene, M.; Knox, J. E.; Cross, J. B.; Bakken, V.; Adamo, C.; Jaramillo, J.; Gomperts, R.; Stratmann, R. E.; Yazyev, O.; Austin, A. J.; Cammi, R.; Pomelli, C.; Ochterski, J. W.; Martin, R. L.; Morokuma, K.; Zakrzewski, V. G.; Voth, G. A.; Salvador, P.; Dannenberg, J. J.; Dapprich, S.; Daniels, A. D.; Farkas, Ö.; Foresman, J. B.; Ortiz, J. V.; Cioslowski, J.; Fox, D. J. Gaussian, Inc., Wallingford CT, **2009**.

15. Miura, T.; Thomas, G. J., Structural Polymorphism of Telomere DNA: Interquadruplex and Duplex-Quadruplex Conversions Probed by Raman Spectroscopy. *Biochemistry* **2002**, *33*, 7848-7856.
